# Supplementary material
Source: PubMed Central journal article supplement (PMC3648057)
Supplement: AEM.03803-12_zam999104396so1.pdf [file AEM.03803-12_zam999104396so1.pdf]

**AEM03803-12: Classification correlating to function of carbohydrate-active enzymes by recognition of short, conserved peptide motifs.**

**Supplemental Material.**

**Accession numbers of eukaryotic, characterized GH5 proteins analyzed by Peptide Pattern Recognition**

ACR82487.1, AAK21882.1, ABY28340.1, BAB62319.1, BAB86867.1, AAC63094.1, AAC33848.1, BAA36216.1, BAD90558.1, CAA61740.1, AAE60102.1, AAC49731.1, ABF50872.1, AAC60541.1, AAL33630.1, BAA29030.1, BAB62317.1, AAR29981.1, AAB69348.1, ACD36972.1, AAN03647.1, CAH69214.1, AAE59927.1, AAK21881.1, AAB51451.1, AAX18655.1, BAD72778.1, ACB06750.1, CAB92326.1, AAK21883.2, AAM21469.1, ABF50886.1, CAA86948.1, CAA11018.1, AAM08614.1, AAF65310.1, AAV05307.1, CAY69081.1, CAA86950.1, AAT97707.1, CAB50968.1, ABK27195.1, AAL84696.1, AAM26920.1, CAK96471.1, AAL01213.1, EAL85463.1, ACH56965.1, ABF50878.1, AAB87859.2, ABV68808.1, ABG79370.1, ACH58411.1, ABC59553.1, AAA67426.1, ACH58410.1, CAA90423.1, ACU52526.1, BAD67544.1, AAG59832.1, AAC05164.1, AAC15708.1, BAA12676.1, ACH63253.1, AAA34213.1, ADH51728.1, AAG50051.1, ABY52965.1, CAA53631.1, ACN43345.1, BAD01163.1, AAD04193.1, BAA90480.1, ACE06751.1, AAC15707.1, AAC48341.1, AAN03645.1, ABF50848.1, AAL16412.1, AAD43818.1, AAC08587.1, BAA76394.1, AAD45868.1, ABZ29259.1, AAC48325.1, AAK85303.1, AAB03889.1, AAB69347.1, CAA86949.1, AAU09785.1, BAE58099.1, CAA63536.1, BAD97445.1, AAA34599.1, CAA86951.1, ACP74152.1, CAA86952.1, ABK27199.1, CAA21163.1, ABF50867.1, ACE81431.1, AAN04103.1, ABF50861.1, CAC08442.1, ADO14134.1, ADN93457.1, CAC51690.3, AAG00315.1, ABB88954.1, ABJ41267.1, BAE78456.1, CAC81056.1, AAX01860.1, ABF50863.1, AAA34208.1, AAK56557.1, ACJ06979.1, ADF28533.1

**Accession numbers of 743 GH61 proteins analyzed by Peptide Pattern Recognition**

Q5BCX8.1, ABT35335.1, ACE10235.1, ACE10233.1, ABW56451.1, ACE10231.1, A1C4H2.1, ACE10232.1, ACE10234.1, AAA53434.1, EEH05325.1, EGC46978.1, XP\_001543425.1, EGE82146.1, EGE79257.1, EEQ84968.1, EEQ89326.1, XP\_002626386.1, XP\_002628516.1, XP\_003015133.1, XP\_003174002.1, XP\_002848955.1, XP\_001268194.1, XP\_001271679.1, XP\_001269010.1, EAW13459.1, XP\_001273555.1, EAW14268.1, XP\_001274726.1, XP\_002380189.1, XP\_002382772.1, XP\_002381515.1

,XP\_002376462.1,EDP54951.1,EDP48657.1,EDP47167.1,EAL88805.1,XP\_748707.1,EAL93749.1,XP\_747482.1,XP\_748715.1,XP\_752040.1,CAF31975.1,BAB62318.1,EAA59072.1,XP\_868906.1,CBF76006.1,CBF73467.1,XP\_660650.1,EAA64499.1,EAA58450.1,EAA59125.1,CBF74037.1,XP\_658645.1,EAA59545.1,XP\_001402213.2,XP\_001397023.2,XP\_001395335.2,XP\_001392640.1,XP\_001400893.2,XP\_001402213.1,CAK41095.1,XP\_001400893.1,XP\_001395530.1,CAK42466.1,CAK97324.1,XP\_001820737.1,BAE56764.1,XP\_001826694.1,BAE55582.1,BAE61530.1,XP\_001821292.1,XP\_001822663.2,BAE58643.1,XP\_001820645.2,XP\_001817584.2,BAE64395.1,BAE60320.1,EAU31074.1,XP\_001208821.1,XP\_001209496.1,XP\_001216541.1,XP\_001210534.1,XP\_001216411.1,EAU33838.1,XP\_001214594.1,XP\_001213388.1,XP\_001208400.1,EAU34150.1,XP\_001216734.1,EDW20470.1,ABV60986.1,CAJ81216.1,CAJ81218.1,CAJ81217.1,CAJ81215.1,XP\_001546774.1,XP\_001553240.1,XP\_001546354.1,XP\_001560175.1,XP\_001552214.1,XP\_001558279.1,XP\_001560894.1,CCD50451.1,CCD50139.1,CCD47228.1,CCD52645.1,CCD34368.1,CCD51504.1,CCD50144.1,CCD48549.1,CCD49290.1,XP\_001225249.1,XP\_001230041.1,XP\_001230192.1,XP\_001222998.1,XP\_001225243.1,XP\_001227602.1,XP\_001223598.1,XP\_001222154.1,EAQ86198.1,XP\_001225332.1,EAQ85056.1,XP\_001226408.1,XP\_001227307.1,XP\_001224385.1,XP\_001229931.1,EAQ91757.1,XP\_001223312.1,XP\_001227193.1,EAQ87022.1,XP\_001226548.1,EAQ92448.1,XP\_001222797.1,XP\_001224181.1,XP\_001225324.1,XP\_001229971.1,XP\_001224238.1,XP\_001220412.1,XP\_001226220.1,XP\_001222217.1,XP\_001225692.1,XP\_001219301.1,XP\_001225412.1,EAQ88640.1,EAQ85642.1,EAQ83639.1,XP\_001225930.1,XP\_001227732.1,XP\_001219583.1,XP\_001228820.1,EAQ89525.1,XP\_001219444.1,EAQ86619.1,XP\_001227508.1,XP\_001223687.1,EGS17840.1,EGS20384.1,EGS21628.1,EGS21609.1,EGS20667.1,EGS22278.1,EGS17558.1,EGS21088.1,EGS20367.1,EGS19579.1,EGS23404.1,EGS23697.1,EGS21285.1,EGS24042.1,EGS19451.1,EGS18626.1,EGS17857.1,XP\_001242606.1,EER27647.1,AAM76663.1,XP\_002910838.1,XP\_001832515.2,XP\_001841257.2,EAU80944.1,XP\_001841005.1,XP\_001832374.2,EAU87138.1,XP\_001838602.1,XP\_001832512.1,EAU80738.1,XP\_001840230.2,EAU89754.1,XP\_001840824.2,EAU80891.2,XP\_001832511.1,XP\_001834453.2,XP\_001832364.2,XP\_001834810.1,XP\_001832633.2,XP\_002911925.1,XP\_001835420.2,EAU81728.2,EAU80304.1,XP\_001839611.1,XP\_001832109.2,EAU86100.1,XP\_001841073.2,EAU91503.2,XP\_001834458.1,XP\_001835421.1,EAU87436.2,EAU83857.1,EAU85243.2,XP\_002910575.1,XP\_001834768.1,CAG27578.1,ADV19810.1,XP\_777868.1,AAW41121.1,ADX07320.1,EGU85487.1,EGU84223.1,EGU75413.1,EGU75302.1,EGU72891.1,EGU85465.1,EGU84205.1,EGU77464.1,EGU80176.1,EGU85118.1,EGU86650.1,EGU74313.1,EGU79199.1,EGU87361.1,XP\_386573.1,XP\_386263.1,XP\_388187.1,XP\_388088.1,XP\_386286.1,XP\_382378.1,XP\_384949.1,XP\_383871.1,XP\_386384.1,XP\_384857.1,XP\_384144.1,XP\_3

91664.1,AEJ35168.1,EFQ25679.1,EFQ34021.1,EFQ36570.1,EFQ25116.1,EFQ31502.1,EFQ35295  
.1,EFQ35966.1,EFQ34537.1,EFQ28963.1,EFQ34071.1,EFQ35170.1,EFQ36324.1,EFQ31130.1,EF  
Q30363.1,EFQ27332.1,EFQ34935.1,EFQ34588.1,EFQ36036.1,EFQ27394.1,EFQ30762.1,EFQ364  
23.1,EFQ29051.1,EFQ34827.1,EFQ25762.1,EFQ34070.1,EFQ33926.1,EFQ33676.1,EFQ35556.1,  
CAQ16206.1,CAQ16278.1,CAQ16208.1,CAQ16217.1,EFX04021.1,EFX04819.1,CAG27577.1,C  
AA71999.1,AAP57753.1,XP\_001883971.1,XP\_001883194.1,XP\_001883867.1,XP\_001877259.1,  
EDR01287.1,XP\_001882292.1,XP\_001885903.1,EDR07117.1,EDR06657.1,EDR15540.1,XP\_001  
881959.1,CBX98254.1,CBX96476.1,CBX96949.1,CBY01256.1,CBY02242.1,CBX96550.1,CBX9  
4572.1,CBY01974.1,CBX91667.1,CBX98126.1,CBY00196.1,CBX91886.1,CBX91313.1,CBX939  
65.1,CBY01257.1,CBX95655.1,CBX94224.1,CBX97718.1,CBY01204.1,CBX94532.1,CBX93546.  
1,EAA51422.1,EDK04335.1,EAA56945.1,EAA54572.1,EAA56258.1,EAA53354.1,EAA53298.1,  
XP\_370106.1,EAA50788.1,EAA53409.1,EAA54517.1,EAA57051.1,XP\_001404656.1,XP\_001408  
162.1,XP\_369715.2,XP\_362640.1,XP\_361583.1,XP\_370106.2,XP\_362483.1,XP\_367775.2,XP\_00  
1410346.1,XP\_364864.1,XP\_001522073.1,XP\_001408450.1,XP\_001405918.1,XP\_369395.1,XP\_  
364682.1,XP\_001406958.1,XP\_367664.2,EGG03285.1,EGG03321.1,EGG08525.1,EGG05780.1,E  
FY92676.1,EFY91792.1,EFZ04469.1,XP\_002392372.1,XP\_002391587.1,XP\_002389015.1,XP\_00  
2388995.1,EEB93545.1,XP\_002391588.1,XP\_002392321.1,XP\_002386353.1,XP\_002389005.1,X  
P\_002386746.1,XP\_002393652.1,XP\_002391345.1,XP\_002389159.1,XP\_002399025.1,XP\_00239  
8849.1,XP\_002386478.1,XP\_002392498.1,XP\_002390217.1,XP\_002399040.1,AEO59955.1,AEO  
60271.1,AEO58412.1,AEO58921.1,AEO54509.1,AEO56016.1,AEO55776.1,AEO58169.1,AEO56  
542.1,AEO56498.1,AEO56547.1,AEO56416.1,AEO59482.1,AEO61257.1,AEO61305.1,AEO5983  
6.1,AEO55082.1,AEO59823.1,AEO61304.1,AEO56642.1,AEO55652.1,AEO56665.1,EGP90215.1  
,EGP91468.1,XP\_003042567.1,XP\_003043105.1,XP\_003046131.1,XP\_003041587.1,XP\_0030459  
40.1,EEU39531.1,XP\_003041666.1,XP\_003040612.1,XP\_003043569.1,XP\_003044062.1,XP\_003  
050482.1,XP\_003050495.1,XP\_003045670.1,XP\_001260913.1,XP\_001267517.1,XP\_001266231.1  
,XP\_001267236.1,XP\_001264507.1,EAW16173.1,XP\_001259147.1,XP\_001262213.1,XP\_001260  
907.1,EAA29018.1,EAA33408.1,XP\_959499.1,XP\_958583.1,EAA36150.2,XP\_962414.1,XP\_963  
702.1,EAA36362.1,EAA26873.1,EAA29132.1,CAD21296.1,CAB97283.2,CAE81966.1,CAD7034  
7.1,CAF05857.1,EGO58503.1,EGO54705.1,EGO56889.1,EGO52064.1,EGO53412.1,EGO58845.1  
,EGO55727.1,EGO61029.1,EGO53245.1,EGO55619.1,EGO61608.1,EGO53330.1,EGO55637.1,E  
GO59472.1,EGO58321.1,XP\_002559170.1,CAP92380.1,XP\_002558168.1,CAP86439.1,XP\_0021  
46302.1,EAT81259.2,XP\_001791800.1,XP\_001792546.1,EAT89418.1,EAT77790.2,XP\_00179082  
6.1,EAT83900.1,XP\_001802947.1,XP\_001791868.1,XP\_001802011.1,XP\_001790904.1,XP\_0017

96146.1,EAT81480.1,XP\_001791556.1,EAT82406.1,XP\_001796313.1,XP\_001795846.1,XP\_001804665.1,EAT77212.1,XP\_001792455.1,XP\_001802269.1,XP\_001793524.1,EAT92310.2,XP\_001797837.1,XP\_001806210.1,XP\_001802359.1,XP\_001796133.1,XP\_001801858.1,XP\_001791546.1,AAM22493.1,CCA74246.1,CCA72192.1,CCA68244.1,CCA72221.1,CCA70703.1,CCA67659.1,CCA73144.1,CCA75037.1,CCA74449.1,CCA72183.1,CCA76671.1,CCA72220.1,CCA73151.1,CCA67656.1,CCA66803.1,CCA74814.1,CCA70418.1,CCA71764.1,CCA70417.1,CCA77877.1,CCA76320.1,CCA67658.1,CCA67657.1,CCA70035.1,CCA72182.1,CAP64732.1,CAP59702.1,XP\_001909024.1,XP\_001906078.1,XP\_001907502.1,CAP68352.1,XP\_001906822.1,CAP65855.1,XP\_001907069.1,XP\_001906810.1,CAP67176.1,CAP68375.1,CAP73072.1,XP\_001904712.1,CAP68309.1,XP\_001906532.1,CAP67190.1,CAP61048.1,XP\_001911495.1,CAP71839.1,CAP73311.1,CAP71532.1,CAP72740.1,CAP65971.1,XP\_001904958.1,CAP67466.1,CAP65111.1,CAP61650.1,CAP65866.1,XP\_001903620.1,CAP61476.1,XP\_001909116.1,CAP73254.1,XP\_002474489.1,XP\_002476952.1,XP\_002474815.1,EED85774.1,XP\_003336129.1,XP\_003335269.1,XP\_003325408.1,XP\_003299575.1,XP\_003296866.1,XP\_003297809.1,XP\_003302923.1,XP\_003301020.1,XP\_003300728.1,XP\_003299166.1,XP\_003303895.1,XP\_003300926.1,XP\_003299671.1,XP\_003304335.1,XP\_003296033.1,XP\_003306650.1,XP\_003298432.1,XP\_003302575.1,XP\_003298498.1,XP\_003305323.1,XP\_003300983.1,XP\_003299949.1,XP\_003301611.1,XP\_003303817.1,XP\_003305915.1,XP\_003299155.1,XP\_003300990.1,XP\_003306203.1,EDU50404.1,XP\_001935377.1,XP\_001931371.1,XP\_001933351.1,EDU46492.1,XP\_001932393.1,XP\_001934008.1,XP\_001940528.1,EDU49193.1,XP\_001937216.1,XP\_001932895.1,XP\_001934763.1,XP\_001939876.1,EDU48860.1,XP\_001933274.1,XP\_001935843.1,XP\_001936296.1,XP\_001930525.1,XP\_001939155.1,XP\_001936652.1,XP\_001932318.1,XP\_001941054.1,XP\_001930436.1,XP\_001936366.1,XP\_001933725.1,EGU12834.1,XP\_003031059.1,XP\_003031883.1,XP\_003034283.1,XP\_003026941.1,XP\_003032377.1,XP\_003031503.1,EFI94694.1,XP\_003033157.1,EFJ00004.1,XP\_003029539.1,XP\_003029596.1,XP\_003028465.1,EFI92060.1,EFI92963.1,XP\_003037795.1,XP\_003027612.1,EFI92604.1,XP\_003026867.1,XP\_003026965.1,EFI95045.1,XP\_003027567.1,EFJ03083.1,XP\_003032165.1,EFI91671.1,XP\_003029697.1,EFI92673.1,XP\_001590753.1,XP\_001589530.1,EDN93954.1,XP\_001597642.1,XP\_001584877.1,EDO00181.1,XP\_001587030.1,XP\_001591031.1,EDO00288.1,EGN99889.1,EGO03895.1,EGN93952.1,EGN94279.1,XP\_003349473.1,XP\_003351982.1,XP\_003352382.1,XP\_003352682.1,XP\_003345666.1,XP\_003352294.1,XP\_003351237.1,XP\_003348785.1,XP\_003348222.1,CBI54781.1,CBI52679.1,CBI58321.1,CBI56951.1,CBI57737.1,CBI58198.1,CBI54870.1,CBI52566.1,CBI54738.1,CBI56992.1,CBI56993.1,YP\_001260935.1,XP\_002478590.1,AEO65580.1,AEO71031.1,AEO68023.1,AEO64605.1,AEO69043.1,AEO67396.1,AEO68157.1,AEO64177.1,AEO67395.1

,AEO68763.1,AEO66274.1,AEO68577.1,AEO62422.1,CAG27576.1,EGR49412.1,EGR49821.1,ADB89217.1,ACH92573.1,ACD36971.1,ADJ57703.1,EGE04098.1,XP\_003235451.1,EGD92942.1,XP\_003019976.1,XP\_002838651.1,CAZ84655.1,XP\_002544405.1,XP\_003001381.1,XP\_003007169.1,XP\_003006393.1,EEY23940.1,XP\_003002463.1,XP\_003000738.1,XP\_003005258.1,XP\_003002719.1,XP\_003002930.1,XP\_003000747.1,XP\_003002008.1,XP\_003002068.1,XP\_003008052.1,XP\_003009235.1,XP\_003004661.1,XP\_003000578.1,EEY22380.1,XP\_003001513.1,EEY16323.1,XP\_003007405.1,XP\_003000367.1,XP\_003003091.1,AAT64005.1,NP\_001130665.1,ACF86151.1,,JGI\_PC15\_v2.0\_4,JGI\_PC15\_v2.0\_13,JGI\_PC15\_v2.0\_16,JGI\_PC15\_v2.0\_6,JGI\_PC15\_v2.0\_5,EGO19398.1,JGI\_PC15\_v2.0\_9,JGI\_PC15\_v2.0\_8,JGI\_PC15\_v2.0\_7,JGI\_PC15\_v2.0\_1,JGI\_PC15\_v2.0\_14,JGI\_PC15\_v2.0\_11,JGI\_PC15\_v2.0\_2,JGI\_PC15\_v2.0\_15,JGI\_PC15\_v2.0\_10,EGN94280.1,JGI\_PC15\_v2.0\_3,JGI\_PC15\_v2.0\_12,JGI\_AB\_v2.0\_1,JGI\_AB\_v2.0\_2,JGI\_AB\_v2.0\_3,JGI\_AB\_v2.0\_4,JGI\_AB\_v2.0\_5,JGI\_AB\_v2.0\_6,JGI\_AB\_v2.0\_7,JGI\_AB\_v2.0\_8,JGI\_AB\_v2.0\_9,GWW2.10.277.1,AAM22493.1,GWW2.2.628.1,GWW2.10.287.1,FGENESH1\_PG.C\_SCAFFOLD\_8000142,E\_GWH2.5.359.1,E\_GWH2.2.646.1,EGO19770.1

Accession numbers are from Genbank except JGI\_AB\_v2.0\_1 - JGI\_AB\_v2.0\_9 from Joint Genome Institute *Agaricus bisporus* genome project and JGI\_PC15\_v2.0\_1 - JGI\_PC15\_v2.0\_16 from Joint Genome Institute *Pleurotus ostreatus* genome project. These sequence data were produced by the US Department of Energy Joint Genome Institute <http://www.jgi.doe.gov/> in collaboration with the user community. GWW2.10.277.1, GWW2.10.287.1, GWW2.2.628.1, E\_GWH2.2.646.1, E\_GWH2.5.359.1 and FGENESH1\_PG.C\_SCAFFOLD\_8000142 were found in the *Phanerochaete chrysosporium* genome (Genbank accession number AADS00000000.1).

## **DNA and amino acid sequences of GH61 PCR products amplified with degenerated primers**

### ***Chaetomium senegalense***

DNA:

ctggagttttcaagatcgacgaggtcggcctggcgcacggcgccaacgcgccccggttctggggctcggaccagctgatcgccaacaacgcc  
gcgtggatggtccagatccccgaggacatcgtccccgc

Amino acid:

LEFFKIDEVGLVDGANAPGFWGSDQLIANNAAWMVQIPEDIAP

### ***Chaetomium thermophilum***

DNA:

cacattgtcacaagtcggccacgaacgccaaagggccatgccgtcatcaaggccgggtgactctgtctacatccagtgggacacctggcccag  
tcgccaccagggccggtcacgactacctgccagctgggcagcggcggtgcgagacggtcgacaagaccagctcgagttctcaagat  
cgccgagggcggctgattgacggctcccaggtcccggaaagtgggctgccgatcagctcgcgccagaacaactcgtggctggcacca  
tccccgagaatatcaagccgct

Amino acid:

HICHKSATNAKGHAVIKAGDSVYIQWDTWPESHGHPVIDYLASCGSAGCETVDKTQLEFF  
KIAEAGLIDGSQAPGKWAADQLIAQNNSWLVTIPENIKP

### *Corynascus thermophilus*

DNA:

gtcggccaccaacgccggcggcatgccgttgtgccggcgacaagattccatccagtgggacacctggcccagtcgcaccacggtc  
cggtcacgactacctgccgactggcgacggcggtgcgagaaggtcgacaagaccacgctcgagttctcaagatcagcgagaaggg  
cctgatcgacggcagcagcgcgccggcaggtggcggtccgacgagctgatcgccaacaacaactcgtggctgggtccagatcccggcca  
catcgcccc

Amino acid:

ICHKSATNAGGHAVVAAGDKISIQWDTWPESHGHPVIDYLADCGDAGCEKVDKTTLEFFK  
ISEKGLIDGSSAPGRWASDELIANNNSWL VQIPPDIAPA

### *Melanocarpus albomyces*

DNA:

tatttgcacaagagcgcgacccccggcgggcgccacgccacggtcgctgccggcgacaagatcagcctggctggacccccgagtggccc  
gagagccacattggccccgtcatcgactacatggcggtgcaacggcgactgcgagacggtaacaaggagtcgctcggtgggtcaagat  
cgacggcgccggctacgacagcagcaagggccagtgggccgccgacgcgctgcgtgagaacggcaacagctggctgggtgcagatccct  
cggacctgccccggcaactacgtgctccggcacgagatcatgctgca

Amino acid:

ICHKSATPGGGHATVAAGDKISLVWTPPEWPEHIGHPVIDYMAACNGDCETVNKESLRWFKI  
DGAGYDSSKGQWAADALRENGNSWL VQIPSDLAPGNYVLRHEIML

### *Talaromyces byssochlamydoides*

DNA:

caccatgggcccgggtcatcaactacctggccaactgtggcgacagctgcgagacggtcgacaagaccacctcaagttcttaagatcgacggc  
gtcggctcttgggacgacaccactgtgccgggcacctggggcgccgaccagctgatcagcaacaacaacagctggctggtcgagatcccccc  
gacctgcgccggaact

Amino acid:

HHGPVINYLANCGDSCETVDKTTLKFFKIDGVGLVDDTTVPGTWGADQLISNNNSWLVEIP  
PTLRRN

### *Talaromyces leycettanus*

DNA:

ccatcacgggcccgggtcatcagctacctggccaactgtggcgccagctgtgagacagtcgacaaaacgacgttgcaattcttaagatcgacaac  
atcggtttcatagatgactctccccccaggcatctgggcagccgatcaattggaagcaacaacaacacctggctcgtggagatccccggac  
catcgtcca

Amino acid:

HHGPVISYLANCGASCETVDKTTLQFFKIDNIGFIDDSSPPGIWAADQLEANNTWLVEIPR  
PSL

### *Talaromyces emersonii*

DNA:

catcacgggcccgggtcatcacgtacctggccaactgcaacggcaactgctcgaccgttgacaagacgcagctggagttcttaagatcgaccag  
tcgggcctgatcaacgacctgacccgccgggcacctgggcgtcgacaacctcatcgccaacaacaacagctggaccgtgacctcccca  
gcaccctcgagccgggcaactacgtgctgcgccacgagacatc

Amino acid:

HHGPVITYLANCNGNCSTVDKTQLEFFKIDQSGLINDTDPPGTWASDNLIANNNSWTVTIPS  
TLEPGNYVLRHET

### *Talaromyces thermophilus*

DNA:

gacgacattattgtcacaaggaggccaagccggcccggccatgccaccgtgaaagccggcgacaagatctacctggacgacattattgt  
cacaagaatgccaacctgctcccaacaagcccaaatcaagcgggcgacaaggtgctgctcagtgctcctcatggcccggcctcctga  
ccaccaggggcctatcatcaactacctagcgagctgcaacggacctgctcaagtgtgcagaaggagagcttaagtgggcaagattgacga  
gactgggctcttccgaacggaacgtgggcaacggacgtgctccgctccaatggaacacatgggatgtgaagatccatcagacctgctcct

Amino acid:

DDIICHKEAKPARGHATVKAGDKIYLDDIICHKNAKPAPNKAQIQAGDKVRLEWSPWPGPP  
DHQGPIINYLASNGPCSSVQKESLKWAKIDETGLFPNGTWATDVLRSNGNTWDVKIPSDL  
L

*Thermoascus aurantiacus*

DNA:

tgccacaaggggtgctgagcctggtgccctgagcgccaaggtggctgctggaggaccgtcgagctgcagtgaggcggattggcctgagagtc  
acaagggcccggcattgactacctgccgctgtaacgggaactgctcgactgtcgacaagaccaaactagagttctcaagattgatgagag  
tggcctaattgacggcagcagcgcgccagggcacatgggcctctgacaacttgattgccaataacaacagctggaccgtcaccatcccagacac  
gatgctaccga

Amino acid:

CHKGAEPGALSAKVAAGGTVELQWTDWPESHKGPVIDYLAACNGNCSTVDKTKLEFFKI  
DEGLIDGSSAPGTWASDNLIANNNSWTVTIPSTMLP

*Malbranchea cinnamomea*

DNA:

cacggtgactgctcgtccgtcgacaagacctcgctcaagttctcaagatcagcgaggccggcctaaacgacggctccaacccccggcca  
gtgggctccgacgatctcattgccaacaacaacagctggactgtgaccatccccaaagtcgatcggccgggcaactacgtgctgcccacga  
gatcatcgccctgcacagcggcggcaaccagaatggcgcccaaaactaccgtccagaagacattgg

Amino acid:

HGDCSSVDKTSLKFFKISEAGLNDGSNAPGQWASDDLIANNNSWTVTIPKSIAPGNYVLRH  
EIIALHSAGNQNGAQNYPSRRHW

*Remersonia thermophila*

DNA:

gacattattgtcaacagtcggccaccaacgccggcgggtacgccgtggtggcggccggcgacaaggctcatcaccagtgaggaccagtggcc  
cgagagccaccacggccccgtcatcgactacctgccagctcgccgagcagcgggctcgacgccgtcaacaaggccgacctcagttgttc  
aagatcggcgaggtcggcctgatcgacggccggcagggccccggcttctggggctccgaccagctcatcgccaacaacgccggctggctcg  
tccagatccccctccgacctcgcgtgatcatctctcgagct

Amino acid:

DIICQQSATNAGGYAVVAAGDKVYIQWDQWPESHGHPVIDYLASCGSTGCDAVNKADLE  
LFKIGEVLIDGRQAPGFWGSDQLIANNAGWLQIPSDLASIISRA



***Scytalidium indonesiacum***

DNA:

tgtcataaccaggccaccaacgcggcgccacgccgtggctcggcgccggcgacaagatctggatccagtgaggaccaatggcccagagac  
caccacggccccgtcctcgactacctcgctcctgcggcagctcgggctgcgagtcggtaacaagctcgacctcaagttctcaagatggc  
gaaaagggcctgatcgacggctcctccgcggcgccgggtggcgctggacgagctgatcgtaacaacgctggctggctggccagatcc  
ccgccgacatcgcgctc

Amino acid:

CHNQATNAGGHAVVAAGDKIWIQWDQWPESHHPVLDYLASCGSSGCESVNKLDLKFFK  
IGEKGGLIDGSSAPGRWASDELIANNAGWLVQIPADIAP

***Scytalidium thermophilum***

DNA:

ctggagttttcaagatcgatgccgctggcttcgaggacggcaagtgggcttctgacaagctcatcgccaacaacaacacctggaccgtgaccg  
tccccgacagcattgcccttgtaatacgtcctccgtcacgagatcatgctctccac

Amino acid:

LEFFKIDAAGFEDGKWASDKLIANNNTWTVTVPDSIAPGQYVLRHEIMLS

***Thermomyces lanuginosus***

DNA:

gacattatctgtcacaaggaagccacaccagccccgggtcatgtctccgtgaaggccgggtgacaagatctacatccaatggcagccgaatccat  
ggccggattcccaccacggtgccccgtcctggactatctggccccttgaacgggcccctgtgagtcctcgacaagaccagcttgcgcttctt  
caagatcgacggagtggtcttatcgacggctcttctcctccgggcaagtgggcccagacgaactccatgcgaacggcaacgggtggctgg  
ttcagatccccgaggacatcaagccg

Amino acid:

DIICHKEATPARGHVSVKAGDKIYIQWQPNPWPDSHHG  
GPVLDYLAPCNGPCESVDKTSRFFKIDGVGLIDGSSPPGKWADDEL  
HANGNGWLVQIPEDIKP

**Fig S1:** Flow scheme for Peptide Pattern Recognition.

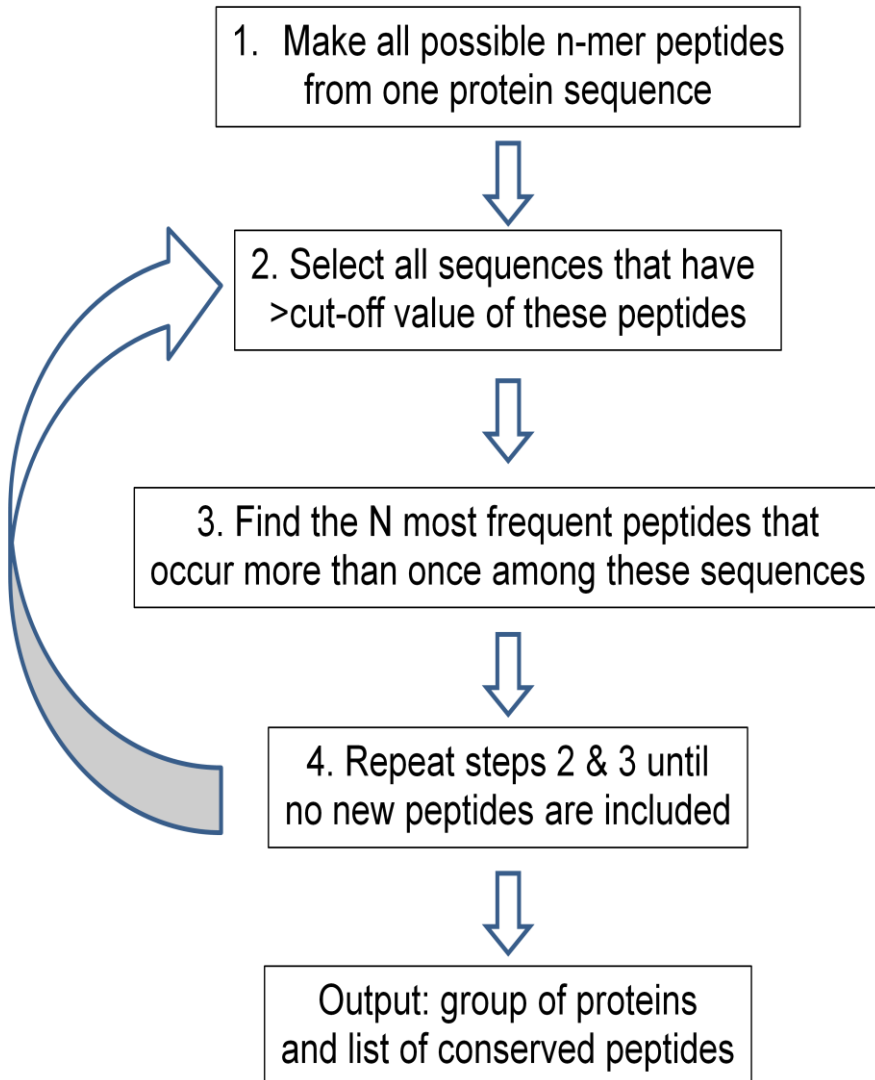

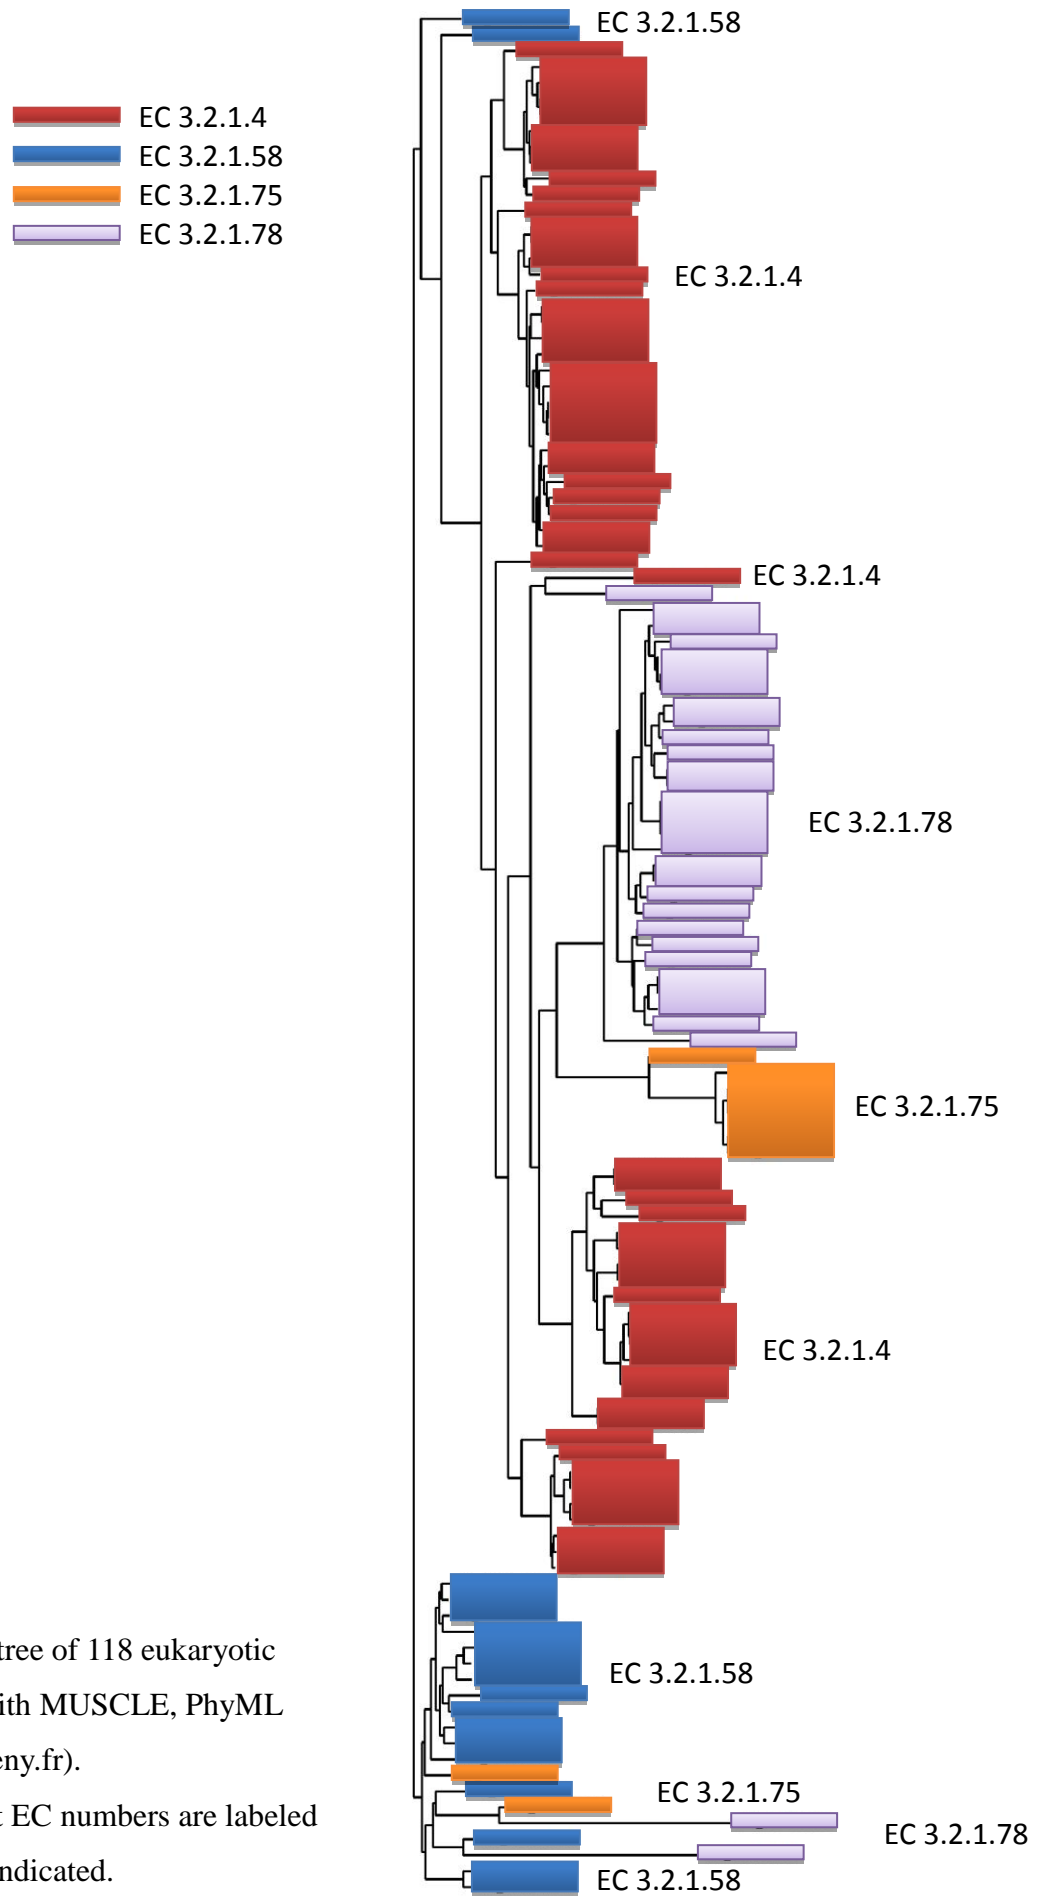

**Fig S2:** Phylogenetic tree of 118 eukaryotic GH5 proteins made with MUSCLE, PhyML and TreeDyn (phylogeny.fr). Proteins with different EC numbers are labeled in different colors as indicated.

| % correct predictions |    |    |    |    |    |    |     |
|-----------------------|----|----|----|----|----|----|-----|
| limit\pep length      | 2  | 3  | 4  | 5  | 6  | 8  | 10  |
| 10                    | 44 | 74 | 96 | 97 | 98 | 99 | 100 |
| 20                    | 46 | 77 | 96 | 96 | 98 | 99 | 100 |
| 30                    | 47 | 83 | 93 | 94 | 96 | 98 | 100 |
| 50                    | 48 | 87 | 92 | 96 | 96 | 97 | 100 |
| 70                    | 49 | 87 | 93 | 96 | 97 | 99 | 100 |
| 100                   | 55 | 84 | 89 | 96 | 98 | 99 | 100 |
| 150                   | 69 | 85 | 90 | 98 | 98 | 98 | 100 |
| 200                   | 66 | 84 | 88 | 97 | 99 | 99 | 100 |
| 400                   | 39 | 87 | 91 | 97 | 98 | 98 | 100 |
| 800                   |    | 88 | 91 | 97 | 99 | 98 | 100 |
| 1600                  |    | 87 | 92 | 98 | 98 | 98 | 100 |
| 3200                  |    | 91 | 92 | 97 | 98 | 99 | 100 |

| % of proteins predicted |    |    |    |    |    |    |    |
|-------------------------|----|----|----|----|----|----|----|
| limit\pep length        | 2  | 3  | 4  | 5  | 6  | 8  | 10 |
| 10                      | 67 | 92 | 67 | 48 | 40 | 34 | 26 |
| 20                      | 83 | 96 | 69 | 61 | 48 | 41 | 31 |
| 30                      | 89 | 97 | 73 | 60 | 53 | 44 | 34 |
| 50                      | 94 | 98 | 77 | 66 | 58 | 43 | 37 |
| 70                      | 96 | 98 | 86 | 73 | 58 | 51 | 38 |
| 100                     | 98 | 98 | 87 | 75 | 62 | 52 | 43 |
| 150                     | 98 | 98 | 92 | 79 | 69 | 54 | 40 |
| 200                     | 98 | 98 | 94 | 79 | 73 | 53 | 45 |
| 400                     | 98 | 98 | 95 | 85 | 77 | 63 | 46 |
| 800                     |    | 98 | 97 | 90 | 80 | 63 | 47 |
| 1600                    |    | 98 | 98 | 91 | 87 | 73 | 51 |
| 3200                    |    | 98 | 98 | 92 | 86 | 74 | 57 |

| correct predictions * proteins predicted |    |    |    |    |    |    |    |
|------------------------------------------|----|----|----|----|----|----|----|
| limit\pep length                         | 2  | 3  | 4  | 5  | 6  | 8  | 10 |
| 10                                       | 29 | 68 | 64 | 46 | 39 | 33 | 26 |
| 20                                       | 38 | 73 | 66 | 58 | 47 | 40 | 31 |
| 30                                       | 41 | 80 | 67 | 56 | 50 | 43 | 34 |
| 50                                       | 45 | 85 | 70 | 63 | 55 | 41 | 37 |
| 70                                       | 47 | 85 | 79 | 70 | 56 | 50 | 38 |
| 100                                      | 53 | 82 | 77 | 72 | 60 | 51 | 43 |
| 150                                      | 67 | 83 | 82 | 77 | 67 | 52 | 40 |
| 200                                      | 64 | 82 | 82 | 76 | 72 | 52 | 45 |
| 400                                      | 38 | 85 | 86 | 82 | 75 | 61 | 46 |
| 800                                      |    | 86 | 88 | 87 | 79 | 61 | 47 |
| 1600                                     |    | 85 | 90 | 89 | 85 | 71 | 51 |
| 3200                                     |    | 89 | 90 | 89 | 84 | 73 | 57 |

**Fig S3:** Use of function-specific peptide lists for prediction of the function of GH5 proteins.

For each enzyme class of characterized GH5 proteins half of the proteins were chosen at random and used to make Peptide Patterns with the indicated parameters. These peptide patterns were used to predict the function of the rest of the characterized GH5 proteins and the percent correct prediction (EC 3.2.1.4, 3.2.1.58, 3.2.1.75 or 3.2.1.78) was measured with the function reported in CAZy as reference. The peptide patterns consisted of 10 – 3200 peptides with a length of 2 – 10 amino acids. No peptide cut-off was used. No data were calculated for 800 – 3200 dimer peptides as there are only 400 possible dimers. Each number represents the average correct prediction rate of ten repetitions.

**Table S1** Sequence of primers for PCR of group 1.

| Peptide | Primer name | Primer sequence <sup>a</sup> |
|---------|-------------|------------------------------|
| DIICHK  | 61.1        | CTGGACGAYATHATHHTGYCAYAA     |
| EIHALH  | 61.2        | CTGGACTGIAGIGCDATDATYTC      |
| HHGPV   | 61.3        | CTGGACCAYCAYGGICCIGT         |
| GAQNYP  | 61.4        | CTGGACGGRTARTTYTGIGCICC      |
| LEFFKI  | 61.5        | CTGGACCTIGARTTYTTYAARAT      |

<sup>a</sup>I = Inosine, Y = C and T, H = A, C and T, D = A, G and T, R = A and G.

**Table S2** Distribution of 540 functionally characterized enzymes in the GH13 subfamilies.

| Subfamily | Assigned function | Other functions in the subfamily                                                     |
|-----------|-------------------|--------------------------------------------------------------------------------------|
| 1         | 10 EC5.4.99.16    | 9 EC3.2.1.10; 7 EC3.2.1.20; 3 EC3.2.1.70; 1 EC2.4.1.-                                |
| 2         | 16 EC3.2.1.68     |                                                                                      |
| 3         | 18 EC2.4.1.18     | 1 EC3.2.1.1                                                                          |
| 4         | 67 EC3.2.1.1      |                                                                                      |
| 5         | 17 EC3.2.1.54     | 10 EC3.2.1.41; 10 EC3.2.1.133; 4 EC3.2.1.135; 2 EC3.2.1.1; 2 EC3.2.1.-; 1 EC3.2.1.33 |
| 6         | 14 EC3.2.1.141    |                                                                                      |
| 7         | 12 EC5.4.99.15    |                                                                                      |
| 8         | 3 EC3.2.1.20      | 1 EC3.2.1.28; 1 EC3.2.1.10                                                           |
| 9         | 16 EC3.2.1.41     | 1 EC3.2.1.68                                                                         |
| 10        | none described    |                                                                                      |
| 11        | 29 EC3.2.1.1      | 2 EC3.2.1.60; 2 EC3.2.1.-; 1 EC3.2.1.98; 1 EC3.2.1.116                               |
| 12        | 25 EC2.4.1.18     |                                                                                      |
| 13        | 18 EC3.2.1.1      |                                                                                      |
| 14        | 4 EC3.2.1.98      | 2 EC3.2.1.1; 1 EC3.2.1.60; 1 EC3.2.1.-                                               |
| 15        | none described    |                                                                                      |
| 16        | 4 EC2.4.1.4       | 2 EC3.2.1.-                                                                          |
| 17        | 31 EC3.2.1.1      | 2 EC2.4.1.25; 1 EC3.2.1.2; 1 EC3.2.1.116; 1 EC3.2.1.-                                |
| 18        | 8 EC3.2.1.41      |                                                                                      |
| 19        | 5 EC2.4.1.7       |                                                                                      |
| 20        | 1 EC3.2.1.54      |                                                                                      |
| 21        | 25 EC2.4.1.19     | 3 EC2.4.1.-; 2 EC3.2.1.1; 1 EC3.2.1.133                                              |
| 22        | 5 EC3.2.1.93      |                                                                                      |
| 23        | 3 EC3.2.1.54      | 1 EC3.2.1.135                                                                        |
| 24        | 16 EC3.2.1.1      | 2 EC3.2.1.116                                                                        |
| 25        | 13 EC3.2.1.20     | 10 EC5.4.99.11                                                                       |
| 26        | 10 EC3.2.1.20     | 2 EC3.2.1.10                                                                         |
| 27        | none described    |                                                                                      |
| 28        | 1 EC5.4.99.16     |                                                                                      |
| 29        | 8 EC2.4.1.183     |                                                                                      |
| 30        | 2 EC3.2.1.33      |                                                                                      |
| 31        | 5 EC3.2.1.1       | 1 EC2.4.1.19                                                                         |
| 32        | 15 EC3.2.1.1      |                                                                                      |
| 33        | 1 EC3.2.1.1       |                                                                                      |
| 34        | none described    |                                                                                      |
| 35        | none described    |                                                                                      |
| 36        | 3 EC3.2.1.1       |                                                                                      |
| 37        | 5 EC2.4.1.7       |                                                                                      |
| 38        | 10 EC3.2.1.1      |                                                                                      |
| 39        | 10 EC3.2.1.1      | 2 EC3.2.1.54                                                                         |
| 40        | none described    |                                                                                      |
| 41        | 1 EC5.4.99.16     | 1 EC3.2.1.54; 1 EC3.2.1.1                                                            |
| 42        | 1 EC3.2.1.1       |                                                                                      |
| 43        | none described    |                                                                                      |
| 44        | 6 EC3.2.1.1       | 1 EC3.2.1.-                                                                          |
| 45        | 2 EC3.2.1.54      |                                                                                      |
| 46        | 1 EC3.2.1.133     | 1 EC3.2.1.1                                                                          |
| 47        | none described    |                                                                                      |
| 48        | none described    |                                                                                      |
| 49        | 1 EC2.4.1.19      |                                                                                      |
| 50        | none described    |                                                                                      |
| Total     | 442 enzymes       | 98 enzymes                                                                           |

**Table S3** Accession numbers of proteins in the 16 GH61 subfamilies

| Subfamily | Accession numbers <sup>a</sup>                                                                                                                                                                                                                                                                                                                                                                                                                                                                                                                                                                                                                                                                                                                                                                                                                                                                                                                                                                                                                                                                                                                                                                                                                                                                                                                                                                                                                                                                                                                                                   |
|-----------|----------------------------------------------------------------------------------------------------------------------------------------------------------------------------------------------------------------------------------------------------------------------------------------------------------------------------------------------------------------------------------------------------------------------------------------------------------------------------------------------------------------------------------------------------------------------------------------------------------------------------------------------------------------------------------------------------------------------------------------------------------------------------------------------------------------------------------------------------------------------------------------------------------------------------------------------------------------------------------------------------------------------------------------------------------------------------------------------------------------------------------------------------------------------------------------------------------------------------------------------------------------------------------------------------------------------------------------------------------------------------------------------------------------------------------------------------------------------------------------------------------------------------------------------------------------------------------|
| 1         | AEO64177.1, AEO58921.1, XP_002478590.1, EAQ85056.1, XP_958583.1, ACH92573.1, EGO54705.1, ADB89217.1, EGE79257.1, XP_002626386.1, ADJ57703.1, EEQ84968.1, CAA71999.1, XP_003050495.1, CCD50144.1, XP_001553240.1, XP_001213388.1, CBI54781.1, EGU75413.1, XP_002146302.1, EGO61608.1, EAA29018.1, XP_003043569.1, EGS19579.1, CAP92380.1, XP_868906.1, XP_001216541.1, XP_001210534.1, EFX04021.1, CAF31975.1, XP_001392640.1, XP_752040.1, XP_001597642.1, XP_001264507.1, NP_001130665.1, XP_658645.1, XP_001906078.1, ABW56451.1, XP_388088.1, CCD48549.1, XP_386286.1, XP_748707.1, XP_001259147.1, CBF73467.1, XP_003044062.1, EAA59545.1, CBI56951.1, EDO00288.1, EDP47167.1, EFQ36324.1, XP_001395530.1, XP_001267517.1, CCD50139.1, XP_002559170.1, XP_382378.1, XP_001400893.1, XP_001269010.1, XP_001404656.1, XP_001267236.1, XP_001400893.2, XP_003043105.1, XP_001402213.1, EGU85487.1, XP_001225249.1, XP_001402213.2, XP_002558168.1, BAE64395.1, BAE56764.1, AEO56542.1, XP_002381515.1, XP_001821292.1, ACF86151.1, EGU80176.1, EEY23940.1, EFQ35170.1, CAP73254.1, XP_002380189.1, XP_001934008.1, EAA59072.1, XP_003303895.1, XP_001214594.1, CBF76006.1, EFQ28963.1, EAA59125.1, CAQ16278.1, EGP90215.1, XP_003002008.1, BAE60320.1, XP_003007405.1, EAQ83639.1, XP_001230192.1, XP_001584877.1, XP_001208821.1, XP_383871.1, EFQ34935.1, XP_001271679.1, EGS20667.1, EGU85118.1, XP_001273555.1, EFQ31130.1, EGU84205.1, EFQ30363.1, XP_003298498.1, XP_001941054.1, XP_001792546.1, XP_384949.1, XP_001791868.1, XP_001546774.1, XP_003002930.1, EDO00181.1 |
| 2         | EFQ34021.1, EAQ86198.1, AEO59955.1, CAD21296.1, EGO61029.1, EAA53409.1, XP_367775.2, CBI52679.1, XP_959499.1, XP_003352294.1, EGO55727.1, XP_003003091.1, AAT64005.1, AEO68023.1, CCA67656.1, AEO56642.1, CCA67657.1, EFQ27332.1, CCA67658.1, XP_001937216.1, CCA67659.1, CAP73072.1, CCA72182.1, XP_001790826.1, EGS17558.1, EAA36362.1, XP_001589530.1, XP_003306203.1, EFQ34537.1, CCA72183.1, EAU86100.1, CCD49290.1, XP_003351982.1, XP_002391345.1, XP_001560175.1, EGO53330.1, XP_001841073.2, CAG27577.1, JGI_PC15_v2.0_16, XP_003029697.1, JGI_AB_v2.0_6, AEO56416.1, XP_001834453.2, CCA72192.1, CAP72740.1, CBY00196.1, CAP61476.1, EGS23404.1, XP_001225324.1, JGI_PC15_v2.0_10, ADX07320.1, XP_001225412.1, CCA70035.1, AEO56016.1, CCA70703.1, EAQ92448.1, CCA72220.1, CBI57737.1, CCA72221.1, XP_001226408.1, XP_001936652.1, XP_003300926.1, EGS18626.1, AEO62422.1, XP_001904712.1                                                                                                                                                                                                                                                                                                                                                                                                                                                                                                                                                                                                                                                                              |
| 3         | AEO59836.1, EAT92310.2, AEO68157.1, XP_001227732.1, CCA74246.1, XP_001904958.1, EGS24042.1, EGS19451.1, XP_003351237.1, AEO60271.1, ACE10234.1, XP_003305915.1, CAP65866.1, CBX94532.1, EDU50404.1, CAG27576.1, CAD70347.1, XP_001906810.1, EGO56889.1, EGO55619.1, AEO61304.1, CBI56992.1, EAA58450.1, XP_001219583.1, CAF05857.1, CBX94572.1, EAQ87022.1, XP_001791556.1, EGS22278.1, EDK04335.1, CCA76320.1, EFQ25679.1, XP_002392372.1, CBI52566.1, EAU33838.1, AEO58169.1, XP_003302575.1, EFI92673.1, CCA71764.1, EFQ34070.1, XP_003300728.1, JGI_PC15_v2.0_13, EAT77790.2, XP_001935377.1, XP_003002719.1, EFQ27394.1, EEY22380.1, CCD51504.1, XP_003034283.1, XP_362483.1                                                                                                                                                                                                                                                                                                                                                                                                                                                                                                                                                                                                                                                                                                                                                                                                                                                                                                |
| 4         | AEO61257.1, EGO58845.1, XP_962414.1, CAP71839.1, XP_003349473.1, EFQ31502.1, EEU39531.1, AEO66274.1, EGU77464.1, XP_003296866.1, XP_003006393.1, XP_001223312.1, XP_001932318.1, EDN93954.1, XP_003004661.1, EFQ35966.1, CAQ16208.1, CCD50451.1, XP_001546354.1,                                                                                                                                                                                                                                                                                                                                                                                                                                                                                                                                                                                                                                                                                                                                                                                                                                                                                                                                                                                                                                                                                                                                                                                                                                                                                                                 |

|    |                                                                                                                                                                                                                                                                                                                                                                                                                                 |
|----|---------------------------------------------------------------------------------------------------------------------------------------------------------------------------------------------------------------------------------------------------------------------------------------------------------------------------------------------------------------------------------------------------------------------------------|
|    | JGI_PC15_v2.0_9, CBY01974.1, XP_001793524.1, CCA73151.1, JGI_PC15_v2.0_11, EFJ00004.1, AEJ35168.1, XP_001907502.1, JGI_PC15_v2.0_5, JGI_AB_v2.0_3, EFJ03083.1, CBX91313.1                                                                                                                                                                                                                                                       |
| 5  | XP_001222797.1, EGO53245.1, AEO67395.1, CBI58321.1, CAE81966.1, EAA26873.1, CBI54870.1, EGO58503.1, XP_001791546.1, XP_001229931.1, ACE10231.1, CAP67190.1, EFQ34588.1, EGO03895.1, XP_003000747.1, JGI_PC15_v2.0_7, CCA70418.1, XP_001933274.1, EGS20384.1, CAJ81215.1, CAP68375.1, XP_001408450.1, EFI92604.1, XP_003026941.1, XP_001560894.1, AEO55652.1, XP_001230041.1, CAP68309.1, EAA57051.1, EFQ36570.1, XP_001832511.1 |
| 6  | EGG03285.1, XP_388187.1, AEO54509.1, XP_003352682.1, EGS23697.1, XP_001222154.1, CAJ81218.1, ACE10235.1, XP_001907069.1, AEO64605.1, XP_963702.1, EGO52064.1, CAP61650.1, EFQ34071.1, CBI54738.1, XP_003299155.1, XP_001932393.1, XP_003002463.1, EAA50788.1, CCD47228.1, AEO59482.1, EGS21609.1, XP_001558279.1, CBY02242.1, XP_001226548.1, AEO55082.1, XP_001591031.1, CAP71532.1, XP_001223687.1, EAT89418.1                |
| 7  | EER27647.1, XP_002544405.1, XP_001242606.1, XP_003015133.1, XP_002848955.1, EGD92942.1, XP_003019976.1, XP_003235451.1, EGE04098.1, XP_003174002.1, XP_002382772.1, BAE61530.1, XP_001822663.2, EEH05325.1, EGC46978.1, XP_002628516.1, XP_001543425.1, EEQ89326.1, EGE82146.1, XP_001266231.1, XP_386263.1, EGU85465.1, EGR49412.1, XP_003348222.1, EFZ04469.1, XP_003050482.1, EFY91792.1, CBF74037.1, XP_364682.1            |
| 8  | XP_003352382.1, , EGO53412.1, CAB97283.2, EAA36150.2, AEO65580.1, ACE10232.1, XP_001410346.1, XP_001522073.1, EDU48860.1, XP_003304335.1, XP_001806210.1, CBX96476.1, EAQ89525.1, CAP73311.1, EGS21628.1, XP_001838602.1, ACE10233.1, JGI_PC15_v2.0_15, EFI94694.1, XP_001220412.1, AEO56665.1, CCA74449.1, XP_003029596.1                                                                                                      |
| 9  | XP_001820645.2, BAE58643.1, XP_001260907.1, EDP54951.1, XP_001208400.1, EAW14268.1, XP_369395.1, EAA64499.1, EFX04819.1, XP_001590753.1, CCD52645.1, XP_386384.1, XP_001552214.1, XP_001939155.1, XP_003302923.1, EGU84223.1, EGR49821.1, EAT83900.1, EFY92676.1, CBX93965.1, AEO55776.1, EGS21285.1, EFQ30762.1, XP_003045940.1                                                                                                |
| 10 | JGI_PC15_v2.0_8, XP_001834768.1, JGI_PC15_v2.0_14, XP_001883194.1, JGI_PC15_v2.0_4, JGI_PC15_v2.0_12, EDR15540.1, EAU87138.1, JGI_AB_v2.0_5, XP_003026965.1, XP_002474815.1, EGN94280.1, JGI_AB_v2.0_4, EED85774.1, EDR07117.1, XP_002389005.1, EFI92060.1, EGN94279.1, EGO19770.1, GWW2.10.277.1, FGENESH1_PG.C_SCAFFOLD_8000142, XP_001802947.1, XP_001228820.1                                                               |
| 11 | XP_001826694.1, EAL88805.1, EAA56258.1, EAW16173.1, EAU34150.1, XP_369715.2, EFQ36423.1, CAP59702.1, XP_001903620.1, EGP91468.1, XP_362640.1, EFQ33676.1, EAT81480.1, EAQ85642.1, XP_003305323.1, XP_001223598.1, XP_003303817.1, XP_001939876.1                                                                                                                                                                                |
| 12 | XP_003001513.1, EAL93749.1, CAK41095.1, XP_001395335.2, CAP86439.1, XP_002376462.1, XP_001820737.1, EAW13459.1, XP_001260913.1, XP_660650.1, XP_001274726.1, EFQ25762.1, CAQ16206.1, EFQ35295.1                                                                                                                                                                                                                                 |
| 13 | EDP48657.1, XP_747482.1, XP_001216411.1, XP_001262213.1, BAE55582.1, XP_001817584.2, XP_001397023.2, CAK42466.1, BAB62318.1, A1C4H2.1, Q5BCX8.1, CBX98254.1                                                                                                                                                                                                                                                                     |
| 14 | XP_001835420.2, EAU80304.1, XP_001835421.1, CAG27578.1, XP_002392498.1, XP_003031503.1, JGI_AB_v2.0_1, CCA68244.1, XP_002398849.1, XP_001885903.1, XP_001839611.1, XP_002399040.1                                                                                                                                                                                                                                               |
| 15 | XP_001841005.1, EGO19398.1, EAU80738.1, EGN93952.1, EAU80891.2, XP_003027567.1, JGI_AB_v2.0_2, XP_001840824.2, EAU89754.1, XP_002910838.1                                                                                                                                                                                                                                                                                       |



16 EGO58321.1, EAA29132.1, CBI58198.1, AEO58412.1, AEO68763.1, EAA53298.1, XP\_367664.2, CAP68352.1, EGS20367.1, XP\_001229971.1

<sup>a</sup>Accession numbers are from Genbank except JGI\_AB\_v2.0\_1 - JGI\_AB\_v2.0\_9 from Joint Genome Institute *Agaricus bisporus* genome project and JGI\_PC15\_v2.0\_1 - JGI\_PC15\_v2.0\_16 from Joint Genome Institute *Pleurotus ostreatus* genome project. GWW2.10.277.1 and FGENESH1\_PG.C\_SCAFFOLD\_8000142 were found in the *Phanerochaete chrysosporium* genome (Genbank accession number AADS00000000.1)

**Table S4** Sequence and frequency of the conserved peptides for the 16 GH61 subfamilies

| Subfamily | Peptides (sequence, frequency)                                                                                                                                                                                                                                                                                                                                                                                                                                                                                                                                                                                                                                                                                                                                                                                                                                                                                                                          |
|-----------|---------------------------------------------------------------------------------------------------------------------------------------------------------------------------------------------------------------------------------------------------------------------------------------------------------------------------------------------------------------------------------------------------------------------------------------------------------------------------------------------------------------------------------------------------------------------------------------------------------------------------------------------------------------------------------------------------------------------------------------------------------------------------------------------------------------------------------------------------------------------------------------------------------------------------------------------------------|
| 1         | (YVLRHE,0.81) (GAQNYP,0.79) (RHEIIA,0.75) (EIIALH,0.75) (HEIIAL,0.75) (QNYPQC,0.74) (AQNYPQ,0.74) (VLRHEI,0.7) (LRHEII,0.68) (NYVLRH,0.55) (GNYVLR,0.55) (IIALHS,0.49) (LEFFKI,0.49) (IALHSA,0.48) (YPQCFN,0.46) (NGAQNY,0.45) (SHHGVP,0.41) (NYPQCF,0.41) (DIICFK,0.35) (PQCFNL,0.35) (ALHSAG,0.34) (PGNYVL,0.32) (EFFKID,0.31) (HHGPVI,0.31) (PDIICH,0.31) (GPVIDY,0.3) (TDPGIL,0.3) (APGNYV,0.3) (ESHHGP,0.29) (PESHHG,0.29) (WPESHH,0.29) (YPQCIN,0.29) (AAHGHV,0.29) (VAAHGH,0.28) (IPGPAL,0.27) (LANCNG,0.27) (DGAQNY,0.27) (TWPESH,0.26) (VIDYLA,0.26) (PVIDYL,0.26) (CETVDK,0.26) (YLANCN,0.25) (FFKIDG,0.25) (IALHGA,0.25) (LHSAGQ,0.23) (ETVDKT,0.23) (ILVNIY,0.23) (GILVNI,0.23) (SHKGPV,0.22) (PQCINL,0.22) (VTGSGT,0.22) (TGSGTA,0.21) (ANCNGD,0.21) (HKGPVI,0.21) (VDKTTL,0.21) (LIANNN,0.21) (NCNGDC,0.21) (DIICHR,0.21) (IAPGNY,0.2) (DPGILV,0.2) (SLEFFK,0.2)                                                                          |
| 2         | (SFPGAY,0.71) (VSFPGA,0.69) (YMECAQ,0.68) (TVSFPG,0.63) (MECAQI,0.54) (GQYLLR,0.51) (FYMECA,0.48) (QFYMEC,0.48) (GAQFYM,0.46) (AQFYME,0.46) (FPGAYS,0.42) (CAQINV,0.42) (APGQYL,0.38) (SAHTIF,0.38) (ECAQIN,0.38) (YLLRAE,0.37) (QYLLRA,0.35) (YLAKVD,0.34) (YTIPGP,0.34) (ASHKGP,0.34) (PGQYLL,0.32) (KVDNAA,0.32) (ASAHTI,0.32) (IAPGQY,0.31) (ELIALH,0.31) (CIAPGQ,0.31) (AKVDNA,0.31) (AYLKKV,0.31) (LAKVDN,0.29) (STVSFP,0.29) (LLRAEM,0.29) (YPGAQF,0.28) (LYGQCG,0.28) (YGQCGG,0.28) (SHKGPI,0.28) (PGAQFY,0.28) (SHKGPT,0.26) (GWFKIQ,0.26) (IALHAA,0.25) (QCGGQG,0.25) (PITDVT,0.25) (GPITDV,0.25) (SYPGAQ,0.25) (GPTTCA,0.25) (GGWFK,0.23) (TGPTTC,0.23) (GGWFKI,0.23) (ITDVTS,0.23) (VDNAAT,0.22) (EMIALH,0.22) (VYLAKV,0.22) (QLYMEC,0.22) (AEMIAL,0.22) (AYLAKV,0.22) (FPGAYK,0.22) (GLKWFK,0.22) (GAQLYM,0.22) (AQLYME,0.22) (LRAEMI,0.22) (CGGQGW,0.22) (DVTSND,0.22) (RAEMIA,0.22) (YLLRVE,0.22) (GQCGGQ,0.2) (LYMECA,0.2) (CAQINI,0.2) |
| 3         | (GGAQFY,0.68) (EHIALH,0.58) (SFPGAY,0.54) (VSFPGA,0.52) (YISCAQ,0.48) (AQFYIS,0.46) (HIALHS,0.46) (QFYISC,0.46) (TDPGIL,0.44) (PGAYKA,0.44) (GAQFYI,0.44) (ATDPGI,0.44) (FPGAYK,0.44) (IALHSA,0.44) (FYISCA,0.44) (PGILIN,0.4) (PVPTS Y,0.36) (GILINI,0.36) (YLLRAE,0.36) (DPGILI,0.36) (GAVWFK,0.34) (AHYTFP,0.34) (YPVPTS,0.34) (KATDPG,0.32) (YKATDP,0.32) (YYPVPT,0.32) (GAYKAT,0.32) (AYKATD,0.32) (NIYYPV,0.3) (IYYPVP,0.3) (VWFKIY,0.28) (LLRAEH,0.28) (GDYLLR,0.26) (FPGAYS,0.26) (ALHSAS,0.26)                                                                                                                                                                                                                                                                                                                                                                                                                                                 |

---

(ISCAQI,0.26) (LVSFPG,0.26) (LHSASS,0.26) (LRAEHI,0.26) (LRVEHI,0.24)  
(VEHIAL,0.24) (GEYLLR,0.24) (VAFPGA,0.24) (RVEHIA,0.24) (AFPGAY,0.24)  
(INIYYP,0.24) (PGAYSA,0.22) (GQTAAT,0.22) (YTPPGP,0.22) (LLRVEH,0.22)  
(GPVTDV,0.22) (AVWFKI,0.22) (VPTSyt,0.22) (GAQFYL,0.22) (ISCAQL,0.22)  
(ILINIY,0.22) (YLLRVE,0.22) (VTGGGS,0.2) (SYTPPG,0.2) (GHPGPL,0.2)  
(DWQYVR,0.2) (IGHPPG,0.2)

---

4 (HEIIAL,0.68) (EIIALH,0.68) (RHEIIA,0.68) (YLVRHE,0.65) (GAQFYP,0.61)  
(PGAQFY,0.58) (YPGAQF,0.58) (LVRHEI,0.55) (GPVITY,0.52) (VRHEII,0.52)  
(PGNGPV,0.52) (IPGNGP,0.48) (IPGPAV,0.48) (PVITYM,0.45) (WTLWPD,0.45)  
(VITYMA,0.45) (ITYMAR,0.45) (GNGPVE,0.42) (FYPGCH,0.42) (VSFPGA,0.42)  
(LWPDSH,0.42) (DSHVGP,0.42) (PDSHVG,0.42) (WPDSHV,0.42) (NGPVED,0.42)  
(SFPGAY,0.42) (TYMARC,0.42) (YYLVRH,0.42) (GYLVR,0.42) (PGCHQL,0.42)  
(TLWPDS,0.42) (YMARCP,0.42) (YPGCHQ,0.42) (AQFYPG,0.39)  
(AAHGYV,0.39) (FPGAYK,0.39) (QFYPGC,0.39) (IALHAA,0.39) (MARCPD,0.39)  
(SHVGPV,0.35) (AHGYVD,0.35) (SYPGAQ,0.35) (LVSFPG,0.32) (AVWFKV,0.32)  
(HVGPVI,0.32) (YQDPYM,0.32) (IIALHA,0.32) (YTIPGP,0.32) (AAGSTV,0.32)  
(VAAHGY,0.32) (VGPVIT,0.32) (PYQDPY,0.32) (PGPAVF,0.29) (GPVEDV,0.29)  
(YTIPSC,0.29) (VTGSGT,0.29) (ITYMAK,0.29) (TYMAKC,0.29) (QVTGSG,0.29)  
(HGYVDN,0.29) (LVAAHG,0.29) (YPIPGP,0.29)

---

5 (YLLRAE,0.77) (VTVEMH,0.68) (TVEMHQ,0.68) (GDYLLR,0.61)  
(DYLLRA,0.61) (VEMHQQ,0.58) (GGAQFY,0.55) (GAQFYM,0.55)  
(SNSPVT,0.55) (AIGGAH,0.55) (EAIGGA,0.55) (NEAIGG,0.52) (TVTTEM,0.45)  
(EMHQQP,0.45) (AQFYMS,0.42) (QFYMSC,0.42) (TCKVGS,0.39)  
(KCPVKA,0.39) (GGAHYG,0.39) (GAHYGP,0.39) (YMSCYQ,0.39)  
(IGGAHY,0.39) (CPVKAG,0.39) (AHYGPV,0.39) (LLRAEV,0.35) (AVSPPY,0.35)  
(KFPGAY,0.35) (PYYSQC,0.35) (VKFPGA,0.35) (FYMSCY,0.35) (SPPYYS,0.35)  
(YMTCYQ,0.35) (APGPAV,0.35) (FPGAYK,0.35) (AHATFQ,0.35) (VSPPYY,0.35)  
(PPYYSQ,0.35) (GWFKIF,0.35) (ALHTAG,0.32) (EVIALH,0.32) (LRAEVI,0.32)  
(PGPAVY,0.32) (PGAYSA,0.32) (AGGTVT,0.32) (SGDYLL,0.32) (AIGGNH,0.32)  
(GYTGCT,0.32) (TVKFPG,0.32) (FQQLWV,0.29) (IALHTA,0.29) (MHQQPG,0.29)  
(ADGSSG,0.29) (RAEVIA,0.29) (STCKVG,0.29) (YGQCGG,0.29) (NSPVTD,0.29)  
(VYMSKV,0.29) (EAIGGN,0.29) (PGDRSC,0.29) (QPGDRS,0.29) (GGTVTV,0.29)  
(GCESTC,0.29) (LLRAEA,0.29) (GTVTVE,0.29) (AEVIAL,0.29)

---

---

6 (VYHQGP,0.87) (TDPGYT,0.8) (YLLRIQ,0.7) (LRCNVG,0.67) (HYIFQQ,0.63)  
(AHYIFQ,0.6) (GEYLLR,0.6) (AVYHQG,0.6) (DLRCNV,0.6) (QFYISC,0.6)  
(IPGAFK,0.6) (YISCAQ,0.6) (PQFYIS,0.6) (FYISCA,0.6) (GYTANI,0.57)  
(YTANIY,0.57) (YTVPGP,0.53) (SNDLRC,0.53) (EYLLRI,0.53) (SAHYIF,0.53)  
(PGYTAN,0.53) (NDLRCN,0.53) (DPGYTA,0.53) (NYNSPV,0.53) (YMSKAP,0.5)  
(YNSPVT,0.47) (SPVTDL,0.43) (NSPVTD,0.43) (NIYSNF,0.43) (RCNVGG,0.43)  
(MSKAPG,0.4) (DYDGSG,0.4) (LLRIQS,0.37) (WFKIKD,0.37) (IHNPWP,0.37)  
(VKAGDS,0.37) (GIPQFY,0.37) (PGAFKE,0.33) (KETDPG,0.33) (SIPGAF,0.33)  
(GIHNPW,0.33) (YHQGPI,0.33) (LRIQSL,0.33) (HNPWPA,0.33) (ANIYSN,0.33)  
(FKETDP,0.33) (AFKETD,0.33) (ETDPGY,0.33) (TNYNSP,0.33) (NYTVPG,0.33)  
(LGIHNP,0.33) (DTAVYH,0.33) (LLRIQQ,0.33) (TANIYS,0.33) (LAIHNP,0.33)  
(HQGPIS,0.33) (GAFKET,0.33) (NPWPAG,0.33) (IYSNFN,0.3) (IPQFYI,0.3)  
(VSIPGA,0.3) (ISCAQI,0.3) (ISCAQV,0.3) (YIFQQL,0.3) (ASAHYI,0.3)

---

7 (GGGSCQ,0.97) (HGGGSC,0.97) (YMNCAP,0.93) (VHGGGS,0.86)  
(AVHGGG,0.83) (GSAVHG,0.76) (SAVHGG,0.76) (SIEGGC,0.72) (GGSCQV,0.72)  
(RIGNRE,0.72) (QRCASG,0.72) (NRIGNR,0.72) (IEGGCP,0.69) (YTLAWT,0.69)  
(GSCQVS,0.69) (TLAWTW,0.69) (MNCAPI,0.66) (KVIHSI,0.62) (GNREMY,0.59)  
(REMYMN,0.59) (NREMYM,0.59) (AWTWFN,0.59) (LAWTWF,0.59)  
(MYMNCA,0.59) (EMYMNC,0.59) (CASGQW,0.55) (IAPGEY,0.55)  
(VSLTTD,0.55) (SCQVSL,0.55) (CQVSLT,0.55) (SVWKVI,0.55) (APGEYT,0.55)  
(SIAPGE,0.55) (RCASGQ,0.55) (QVSLTT,0.55) (WNCIGG,0.52) (EGGCPA,0.52)  
(CPANVD,0.48) (GGCPAN,0.48) (FQRCAS,0.48) (GCPANV,0.48) (ANVDGN,0.48)  
(PANVDG,0.48) (HRRRGH,0.45) (IGNREM,0.45) (VDGNLP,0.45)  
(NVDGNL,0.45) (ASGQWT,0.41) (FYMNCA,0.41) (EFYMNC,0.41)  
(REFYMN,0.41) (MFVANI,0.38) (VWKVIH,0.38) (IGNREF,0.38) (NREFYM,0.38)  
(EYTLAW,0.38) (TWFNRI,0.38) (HSIEGG,0.38) (IHSIEG,0.38) (GEYTLA,0.38)  
(IGSAVH,0.38) (FNRIGN,0.38) (WTFNRI,0.38) (WKVIHS,0.38) (VIHSIE,0.38)  
(GNREFY,0.38) (WFNRIG,0.38) (FIGSAV,0.38)

---

8 (GAVTSY,0.79) (HGAVTS,0.79) (RHELLA,0.75) (APGNYL,0.71) (AHGAVT,0.71)  
(ALHQAN,0.71) (ELLALH,0.67) (LALHQA,0.67) (GWFKID,0.67) (HELLAL,0.67)  
(LLALHQ,0.67) (WFKIDE,0.63) (LIRHEL,0.63) (YLIRHE,0.63) (HQANTP,0.58)  
(ANTPQF,0.58) (NTPQFY,0.58) (IRHELL,0.58) (QANTPQ,0.58) (LAPGNY,0.58)  
(GNYLIR,0.54) (CNGGTS,0.54) (AAHGAV,0.54) (NYLIRH,0.54) (YAECAQ,0.54)

---

---

(FYAECA,0.54) (QFYAEC,0.54) (NGGTSA,0.54) (PQFYAE,0.54) (PGYEGF,0.5)  
(SPASSP,0.5) (TYPGYE,0.5) (GFSPAS,0.5) (FSPASS,0.5) (YPGYEG,0.5) (LHQANT,0.5)  
(WKQWTH,0.5) (EGFSPA,0.46) (PGNYLI,0.46) (YEGFSP,0.46) (GYEGFS,0.46)  
(QFYPEC,0.46) (SPKTIQ,0.46) (TPQFYA,0.46) (VTSYII,0.46) (FYPECA,0.46)  
(RCNGGT,0.46) (PQFYPE,0.46) (AVTSYI,0.42) (PASSPK,0.42) (SSPKTI,0.42)  
(ASSPKT,0.42) (GDGKGW,0.38) (KGWFKI,0.38) (QGPVMV,0.38) (DGKGWF,0.38)  
(THEQGP,0.38) (YPECAQ,0.38) (HEQGPV,0.38) (WTHEQG,0.38) (GKGWFK,0.38)  
(WPDYNP,0.38) (QWPDYN,0.38) (VWMYKC,0.38) (QWTHEQ,0.38)

---

9 (GPCAVY,0.75) (HKGPCA,0.67) (KGPCAV,0.67) (QGDGTC,0.58) (GDGTCV,0.54)  
(GDGWFK,0.54) (DGTCVR,0.54) (GWFKIW,0.54) (AGDGWF,0.5) (AAGDGW,0.5)  
(CAVYMK,0.46) (YVGCAQ,0.46) (ELLALH,0.46) (PCAVYM,0.46) (GYLVR,0.42)  
(NQGDGT,0.42) (LTFEFR,0.42) (SHKGPC,0.42) (DGWFKI,0.42) (NANWCG,0.38)  
(DPQFYV,0.38) (GTCVRM,0.38) (YLVRPE,0.38) (QFYVGC,0.38) (CTEKLI,0.38)  
(WCTEKL,0.38) (PQFYVG,0.38) (FYVGCA,0.38) (GCAQIF,0.33) (KWCTEK,0.33)  
(VYMKKV,0.33) (LALHAA,0.33) (YPIPGP,0.33) (YYLVRP,0.33) (TTLYVD,0.29)  
(NAAGDG,0.29) (KNANWC,0.29) (RPEILA,0.29) (RPELLA,0.29) (PELLAL,0.29)  
(EILALH,0.29) (AHTVFT,0.29) (TTFTTL,0.29) (MKKVDD,0.29) (TCVRMP,0.29)  
(HTTFTT,0.29) (YMKKVD,0.29) (GPPNKG,0.29) (PPNKGK,0.29) (PEILAL,0.29)  
(TVSIPG,0.29)

---

10 (GGAEFY,0.78) (GAEFYP,0.65) (EFYPSC,0.57) (VSFPGA,0.57) (SFPGAY,0.57)  
(AEFYPS,0.57) (HEIAL,0.52) (RHEIA,0.52) (EIALH,0.52) (LVSFPG,0.52)  
(APGNYL,0.52) (FYPSCT,0.43) (IALHL,0.43) (YLIRHE,0.43) (YPSCTQ,0.43)  
(IRHEI,0.43) (LIRHEI,0.39) (ELVSFP,0.39) (AKWFKI,0.39) (IALHLA,0.39)  
(GNYLIR,0.3) (TYMASC,0.3) (PGAYSD,0.3) (LAPGNY,0.3) (ASCGST,0.3)  
(WPHNTG,0.3) (GPMLTY,0.3) (YMASC,0.3) (PHNTGP,0.3) (NYLIRH,0.26)  
(WFKIDQ,0.26) (YVFPGP,0.26) (NLAPGN,0.26) (NIAPGN,0.26) (YLLRHE,0.26)  
(IAPGNY,0.26) (HNTGPM,0.26) (FPGAYS,0.26) (PGNYLI,0.26) (VFPGBP,0.26)  
(TGPMLT,0.26) (FPGAYK,0.22) (NTGPML,0.22) (TFPGGY,0.22) (EGGAEF,0.22)  
(MLTYLA,0.22) (PSCTQI,0.22) (KWFKID,0.22) (PMLTYL,0.22) (GGSGTG,0.22)  
(TYLASC,0.22) (YLASC,0.22)

---

11 (LVRVEH,0.94) (YLVRVE,0.94) (VRVEHI,0.89) (GDWFKV,0.61) (YDGSGD,0.56)  
(MSKAPG,0.56) (DGSGDW,0.56) (VKIPGL,0.5) (GSGDWF,0.5) (RVEHIA,0.5)  
(SKAPGD,0.5) (SGDWFK,0.5) (CAQIEV,0.5) (KIPGLY,0.5) (PGPLVK,0.44)  
(YFTCAQ,0.44) (FYFTCA,0.44) (FTCAQI,0.44) (YMSKAP,0.44) (TCAQIE,0.44)  
(LVKIPG,0.44) (GPLVKI,0.44) (EFYFTC,0.44) (KAPGDV,0.44) (PLVKIP,0.44)  
(EHIAIH,0.39) (GQYLVR,0.39) (QFYMEC,0.39) (QYLVRV,0.39) (GEYLVR,0.39)

---

|    |                                                                                                                                                                                                                                                                                                                                                                                                                                                                                                                                                                                                                                                                                                                                                                                                                                                                                                                                                                                           |
|----|-------------------------------------------------------------------------------------------------------------------------------------------------------------------------------------------------------------------------------------------------------------------------------------------------------------------------------------------------------------------------------------------------------------------------------------------------------------------------------------------------------------------------------------------------------------------------------------------------------------------------------------------------------------------------------------------------------------------------------------------------------------------------------------------------------------------------------------------------------------------------------------------------------------------------------------------------------------------------------------------|
|    | (RVEHIG,0.39) (PSFTSE,0.33) (SYDGSG,0.33) (IEVTGS,0.33) (VEHIGL,0.33)<br>(QIEVTG,0.33) (EVTGSG,0.33) (EYLVRV,0.33) (EHIGLH,0.33) (AQFYME,0.33)<br>(DGDWFK,0.33) (WYSQCV,0.33) (AQIEVT,0.33) (VEHIAI,0.33) (GDGDWF,0.33)<br>(YMPSFT,0.33)                                                                                                                                                                                                                                                                                                                                                                                                                                                                                                                                                                                                                                                                                                                                                  |
| 12 | (SAHYFF,1.0) (AHYFFD,1.0) (FRCNKG,0.86) (YMSKAP,0.86) (YNPTKW,0.86)<br>(DFRCNK,0.86) (KYNPTK,0.86) (EHIGVH,0.86) (YPMPGP,0.86) (DGEYLI,0.79)<br>(GEYLIR,0.79) (VKAGSK,0.79) (VYMSKA,0.79) (LVYMSK,0.79) (VRSNTR,0.79)<br>(EVKAGS,0.79) (PSFNFS,0.71) (PDGEYL,0.71) (VSAHYF,0.71) (DDMTPD,0.71)<br>(TAEVKA,0.71) (IGVHGA,0.71) (RSNTRP,0.71) (AKYNPT,0.71) (HIGVHG,0.71)<br>(DPSFNF,0.71) (AEVKAG,0.71) (RDDMTP,0.71) (GVHGAH,0.64) (GDGDWF,0.64)<br>(GQAEFY,0.64) (GDWFKI,0.64) (AGSKLA,0.64) (GTAEVK,0.64) (KDYPMP,0.64)<br>(CAQVKV,0.64) (TGTAEV,0.64) (KAGSKL,0.64) (DYPMPG,0.64) (DGDWFK,0.64)<br>(TRPAKY,0.57) (RPAKYN,0.57) (GPALVY,0.57) (YLIRPE,0.57) (RPEHIG,0.57)<br>(PGPAVW,0.57) (PALVYM,0.57) (IRPEHI,0.57) (GTPGPT,0.57) (HPGPAL,0.57)<br>(TFAGQT,0.57) (LIRPEH,0.57) (SNTRPA,0.57) (PAKYNP,0.57) (FTFAGQ,0.57)<br>(MQHPGP,0.57) (ALVYMS,0.57) (NTRPAK,0.57) (PGPALV,0.57) (EYLIRP,0.57)                                                                                    |
| 13 | (RPEIIA,1.0) (PEIIAL,1.0) (ALHEGN,1.0) (EIIALH,1.0) (IALHEG,1.0) (IIALHE,1.0)<br>(LHEGNR,1.0) (DMTCNV,0.92) (VYMAPT,0.92) (YMECVQ,0.92) (TFEWHH,0.92)<br>(LALAAA,0.92) (SDDIIA,0.92) (IIASSH,0.83) (DDIIAS,0.83) (GVSIPG,0.83)<br>(GAQFYM,0.83) (AQFYME,0.83) (DIIASS,0.83) (MTCNVN,0.83) (QFYMEC,0.83)<br>(FYMECV,0.83) (WVKIAE,0.83) (PDVPAG,0.75) (YIRSPP,0.75) (YPIPGP,0.75)<br>(LLALAA,0.75) (SYPIPG,0.75) (GYIRSP,0.75) (GGAQFY,0.75) (TCNVNG,0.75)<br>(VPDVPA,0.75) (PGPAVW,0.67) (GILFDI,0.67) (ILFDIY,0.67) (FRPEII,0.67)<br>(TVPDVP,0.67) (YLFIRPE,0.67) (LFRPEI,0.67) (WDGSSS,0.58) (ECVQVK,0.58)<br>(MVYMAP,0.58) (FDIYNS,0.58) (DGSSSG,0.58) (DIYNSF,0.58) (GPAVWD,0.58)<br>(SFDSYP,0.58) (GSSSGS,0.58) (DSDDII,0.58) (VWDGSS,0.58) (VQVKVT,0.58)<br>(GWVKIA,0.58) (QVKVTS,0.58) (PAVWDG,0.58) (YMAPTE,0.58) (LAAAAK,0.58)<br>(SDSDDI,0.58) (ADGYIR,0.58) (VKAGDK,0.58) (RSDSDD,0.58) (MECVQV,0.58)<br>(ALAAAA,0.58) (CVQVKV,0.58) (AVWIND,0.58) (ITVPDV,0.58) (SSSGSS,0.58) |
| 14 | (PGLTVN,0.67) (DPGLTV,0.67) (KVSIPG,0.67) (GLTVNI,0.67) (GLHVAG,0.67)<br>(ISCAQI,0.58) (AAIYLG,0.58) (VSIPGY,0.58) (PAAIYL,0.58) (IGLHVA,0.58)<br>(SIPGYV,0.58) (GPAAIY,0.58) (LHVAGA,0.58) (YTVPGP,0.58) (SWDGSG,0.58)<br>(HVAGAP,0.58) (IPGYVS,0.58) (VAGAPQ,0.58) (YISCAQ,0.58) (SYTVPG,0.5)<br>(ASWDGS,0.5) (PTSYTV,0.5) (LTVNIY,0.5) (WFKIAE,0.5) (FKIAEW,0.5) (KIAEWG,0.5)<br>(WGATFN,0.42) (AIYLGQ,0.42) (IAEWGA,0.42) (HQPAA,0.42) (YNPVPT,0.42)<br>(QIGLHV,0.42) (EQIGLH,0.42) (GSGANW,0.42) (RQPLNN,0.42) (NPPKVS,0.42)                                                                                                                                                                                                                                                                                                                                                                                                                                                         |

|    |                                                                                                                                                                                                                                                                                                                                                                                                                                                                                                                                                                                                                                                                                                                                                            |
|----|------------------------------------------------------------------------------------------------------------------------------------------------------------------------------------------------------------------------------------------------------------------------------------------------------------------------------------------------------------------------------------------------------------------------------------------------------------------------------------------------------------------------------------------------------------------------------------------------------------------------------------------------------------------------------------------------------------------------------------------------------------|
|    | (SAHYIW,0.42) (GATFNP,0.42) (PPKVSI,0.42) (IYNPVP,0.42) (WDGSGA,0.42)<br>(TSYTV,0.42) (SGANWF,0.42) (NIYNPV,0.42) (GNPPKV,0.42) (ATFNPF,0.42)<br>(EWGATF,0.42) (DGSGAN,0.42) (PKVSIP,0.42) (GANWFK,0.42) (YHQGPA,0.42)                                                                                                                                                                                                                                                                                                                                                                                                                                                                                                                                     |
| 15 | (SCAQIN,0.8) (LVSIPG,0.7) (PLVSIP,0.7) (PGPAVW,0.7) (CAQINV,0.7) (SIPGVY,0.7)<br>(VSIPGV,0.7) (WFKVHE,0.6) (GTPGPL,0.6) (GPLVSI,0.6) (TPGPLV,0.6) (PGPLVS,0.6)<br>(VWFKVH,0.6) (GNGTPG,0.6) (NGTPGP,0.6) (LSCAQI,0.6) (GGNGTP,0.5)<br>(QPGPAV,0.5) (PSGQYL,0.5) (LPSGQY,0.5) (SLPSGQ,0.5) (GQVWFK,0.5)<br>(VRRTDN,0.5) (QYVRR,0.4) (PIPANY,0.4) (GVYNGR,0.4) (PGVYNG,0.4)<br>(IPGVYN,0.4) (FKVHEI,0.4) (NGREPG,0.4) (YNGREP,0.4) (QFFLSC,0.4) (YVRRTD,0.4)<br>(VYNGRE,0.4) (GGAQFY,0.4) (VTDVTS,0.4) (YLSCAQ,0.4) (AQINVQ,0.4)<br>(PVTDTV,0.4) (WQYVRR,0.4) (GILINI,0.4) (EPGILI,0.4) (PGILIN,0.4)                                                                                                                                                         |
| 16 | (PDIICH,0.9) (GAQNYP,0.9) (QWNGWP,0.9) (ALAHSH,0.7) (RWATDV,0.6)<br>(GTPVVV,0.6) (DIICHR,0.6) (AHAPVR,0.6) (IQWNGW,0.6) (GPPGRW,0.5)<br>(WATDVL,0.5) (PYVLRH,0.5) (APVRAG,0.5) (VLSYLA,0.5) (GGAQNY,0.5)<br>(DDGFVT,0.5) (GPVLSY,0.5) (HELIAL,0.5) (GPYVLR,0.5) (PPGRWA,0.5) (ATDVLI,0.5)<br>(YVLRHE,0.5) (ELIALH,0.5) (HAPVRA,0.5) (RHELIA,0.5) (PVLSYL,0.5) (DGFVTP,0.5)<br>(TPVVVT,0.4) (SQALAH,0.4) (VQWNGW,0.4) (CVNLWV,0.4) (TDVLIA,0.4)<br>(IALHYA,0.4) (VNLWVE,0.4) (QALAH,0.4) (GCAGVD,0.4) (PVRAGD,0.4)<br>(GFDPRP,0.4) (AQNYPL,0.4) (IICHRD,0.4) (VDDGFV,0.4) (LAHSHI,0.4) (SYLAPC,0.4)<br>(WTKIDD,0.4) (QNYPLC,0.4) (NNSWQV,0.4) (ICHRDG,0.4) (LSYLAP,0.4)<br>(CAGVDK,0.4) (AVDDGF,0.4) (TKIDDS,0.4) (IALHFA,0.4) (PGPYVL,0.4)<br>(HIQWNG,0.4) |

**Table S5:** Number of conserved peptides from each GH61 subfamily and sum of their frequencies in GH61E (Genbank accession number XP\_003657366).

| Subfamily            | 1   | 2    | 3    | 4    | 5    | 6   | 7 | 8 | 9 | 10   | 11 | 12 | 13   | 14 | 15  | 16 |
|----------------------|-----|------|------|------|------|-----|---|---|---|------|----|----|------|----|-----|----|
| Peptides             | 1   | 2    | 26   | 2    | 3    | 3   | 0 | 0 | 0 | 1    | 0  | 0  | 1    | 4  | 3   | 0  |
| $\Sigma$ Frequencies | 0.3 | 0.79 | 9.12 | 0.61 | 1.64 | 1.8 | 0 | 0 | 0 | 0.26 | 0  | 0  | 0.75 | 2  | 1.2 | 0  |

**Table S6:** Classification of the enzymatically characterized GH61 into PPR subfamilies.

| Accession  | Species                            | Type            | Ref <sup>a</sup> | Subfamily | Freq <sup>b</sup> | Peps <sup>c</sup> | P-value                |
|------------|------------------------------------|-----------------|------------------|-----------|-------------------|-------------------|------------------------|
| CAP73254.1 | <i>Podospora anserina</i>          | nd <sup>d</sup> | 6                | 1         | 8.3               | 18                | 1.3×10 <sup>-80</sup>  |
| CAP68375.1 | <i>Podospora anserina</i>          | nd <sup>d</sup> | 6                | 5         | 7.7               | 18                | 1.3×10 <sup>-80</sup>  |
| NCU02916   | <i>Neurospora crassa</i>           | nd <sup>d</sup> | 24               | 2         | 8.0               | 22                | 1.9×10 <sup>-99</sup>  |
| NCU01867   | <i>Neurospora crassa</i>           | nd <sup>d</sup> | 24               | 5         | 15.8              | 39                | 1.8×10 <sup>-189</sup> |
| NCU03328   | <i>Neurospora crassa</i>           | nd <sup>d</sup> | 24               | 3         | 8.1               | 22                | 1.4×10 <sup>-104</sup> |
| NCU08760   | <i>Neurospora crassa</i>           | 1               | 31               | 5         | 15.6              | 39                | 1.4×10 <sup>-189</sup> |
| NCU01050   | <i>Neurospora crassa</i>           | 2               | 31               | 2         | 11.9              | 32                | 6.8×10 <sup>-157</sup> |
| NCU07898   | <i>Neurospora crassa</i>           | 2               | 31               | 4         | 20.7              | 48                | 2.7×10 <sup>-250</sup> |
| ABW56451.1 | <i>Thermoascus aurantiacus</i>     | 1               | 15               | 1         | 12.4              | 25                | 9.3×10 <sup>-120</sup> |
| ACE10231.1 | <i>Thielavia terrestris</i>        | nd <sup>d</sup> | 15               | 5         | 12.7              | 32                | 1.9×10 <sup>-152</sup> |
| ACE10234.1 | <i>Thielavia terrestris</i>        | nd <sup>d</sup> | 15               | 3         | 9.1               | 26                | 8.9×10 <sup>-118</sup> |
| BAL43430.1 | <i>Phanerochaete chrysosporium</i> | nd <sup>d</sup> | 39               | 13        | 11.5              | 21                | 1.9×10 <sup>-103</sup> |

<sup>a</sup>Reference, <sup>b</sup>Sum of frequencies of peptides, <sup>c</sup>number of peptides, <sup>d</sup>not determined
